# Supplementary material
Source: MDPI journal article supplement (https://www.mdpi.com/2673-8007/2/4/58)
Supplement: s1 [file s1 › applmicrobiol-1899776R1_Supplementary files.pdf]

**Table S1:** Data on growth and acidification of some\* probiotics in media with IPEC-J2 animal cell cultures.

| Species α                                                                          | Probiotic                                      |           |                      |          | IPEC-J2 cell culture |                                                    |                                                                                                       |            |
|------------------------------------------------------------------------------------|------------------------------------------------|-----------|----------------------|----------|----------------------|----------------------------------------------------|-------------------------------------------------------------------------------------------------------|------------|
|                                                                                    | Inoculation CFU/mL                             | Final CFU | Incubation time (h)  | Final pH | Medium **            | Cytotoxicity                                       | Parameter tested                                                                                      | References |
| <i>Lactobacillus rhamnosus</i> GG<br><i>Lactobacillus acidophilus</i> NCFM         | 1.0 x 10 <sup>6</sup><br>1.0 x 10 <sup>8</sup> | ND        | 24                   | ND       | DMEM/F12             | Inoc. > 10 <sup>7</sup><br>Inoc. > 10 <sup>9</sup> | Protection against rotavirus infection                                                                | [6]        |
| <i>Lactobacillus reuteri</i>                                                       | 1 x 10 <sup>8</sup> a<br>1 x 10 <sup>9</sup> a | ND        | 6 h                  | ND       | DMEM/F12             | ND                                                 | Epithelial barrier integrity – against E coli                                                         | [52]       |
| 5 <i>Lactobacillus</i> and 2 <i>Bifidobacterium</i> species                        | 1 x 10 <sup>8</sup>                            | ND        | 90 min<br>24 h       | ND       | DMEM + FCS           | ND                                                 | Vesicular stomatitis virus infectivity                                                                | [2]        |
| Four <i>Lactobacillus reuteri</i> strains                                          | 1 x 10 <sup>7</sup> b                          | ND        | 16 h                 | ND       | DMEM + FBS           | ND                                                 | Protection against intestinal inflammation                                                            | [53]       |
| Eleven <i>Lactobacillus</i> species                                                | 1 x 10 <sup>8</sup> c                          | ND        | 60 min               | ND       | DMEM/F12             | ND                                                 | Competitive exclusion of <i>E. coli</i>                                                               | [54]       |
| LGG<br><i>L. Johnsonii</i> and <i>L. reuteri</i>                                   | 3 x 10 <sup>7</sup> d                          | ND        | 12 h                 | 4.0      | DMEM/F12             | LDH :Yes<br>LDH : No                               | Effect of gut barrier functions and<br>Protection against ETEC infections                             | [18]       |
| <i>L. rhamnosus</i>                                                                | 1 x 10 <sup>8</sup>                            | ND        | 3 h                  | ND       | DMEM/F12             | Apoptose                                           | Effect of <i>L. rhamnosus</i> alone, pre incubated and co-incubated with ETEC on apoptosis of IPEC-J2 | [55]       |
| <i>P. pentosaceus</i>                                                              | 5 x 10 <sup>5</sup><br>to 5 x 10 <sup>7</sup>  | ND        | 6 h                  | ND       | DMEM/F12             | Trypan blue<br>No                                  | Evaluation of <i>P. pentosaceus</i> and its impact on inflammatory response in IPEC-J2 to ETEC        | [56]       |
| <i>L. plantarum</i>                                                                | 5 x 10 <sup>7</sup>                            | ND        | 6 h                  | ND       | DMEM/F12             | No change TEER                                     | Effects of <i>L. plantarum</i> on epithelial barrier disruption caused by ETEC in IPEC-J2             | [41]       |
| <i>L. helveticus</i>                                                               | 3 x 10 <sup>7</sup>                            | ND        | 24-48-72 h           | ND       | DMEM/F12             | MTT: No<br>TEER: No<br>Apoptose: No                | Effects of citrulline and <i>L. helveticus</i> ASCC 511 on intestinal epithelial cell integrity       | [57]       |
| <i>L. salivarius</i> + ETEC                                                        | 1 x 10 <sup>5</sup> b                          | No        | 3 h-to 24 h          | ND       | RPMI                 | LDH combined with ETEC                             | Protective effect of <i>L. salivarius</i> on ETEC adhesion on IPEC-J2 cells                           | [58]       |
| <i>L. reuteri</i> , <i>Salomonella enterica</i> ,<br><i>Bacillus licheniformis</i> | 1.5 x 10 <sup>8</sup> e                        | ND        | 60 min,<br>overnight | ND       | DMEM/F12             | ND                                                 | Effect on chemokine cytokine expression                                                               | [59]       |
| <i>L. plantarum</i> ETEC                                                           | 5 x 10 <sup>7</sup> e                          | ND        | 6 h                  | ND       | DMEM/F12             | ND                                                 | Protective effect of <i>L. plantarum</i> against ETEC in IPEC-J2                                      | [60]       |
| <i>L. gasseri</i>                                                                  | MOI 100 f                                      | ND        | 2 h -4 h             | ND       | DMEM/F12             | ND                                                 | Activation of the oxidative phosphorylation pathway in IPEC-J2                                        | [61]       |
| <i>L. casei</i>                                                                    | 1x10 <sup>8</sup> c                            | ND        | 3 h                  | ND       | DMEM/F12             | No: (CCK 8)                                        | Protective effect of <i>L. casei</i> ATCC 393 on IPEC-J2 cells infected by ETEC                       | [62]       |
| <i>L. johnsonii</i>                                                                | 3 x 10 <sup>6</sup>                            | ND        | 3 h                  | ND       | DMEM/F12             | No: (Trypan blue)                                  | Protection of <i>L. johnsonii</i> against <i>S. infantidis</i> infection in IPEC-J2                   | [63]       |
| <i>E. coli</i> Nissle                                                              | MOI 10 to 100 f                                | ND        | 2 h- 6 h             | ND       | DMEM/F12             | ND                                                 | Inhibitory effect of <i>E. coli</i> Nissle on <i>S. thyphimurium</i> in IPEC-J2 cells                 | [64]       |
| <i>Enterococcus faecium</i>                                                        | 2 x 10 <sup>6</sup> a                          | ND        | 2 h-4 h-6 h          | ND       | DMEM/F12             | No change TEER                                     | Protective effect of <i>E. faecium</i> against ETEC                                                   | [65]       |
| 11 strains: <i>Pediococcus</i> , <i>Lactobacillus</i> , <i>Enterococcus</i>        | 1 x 10 <sup>8</sup>                            | ND        | 2 h                  | ND       | DMEM + 10% FCS       | ND                                                 | Adhesion of LAB to IPEC-J2 cells                                                                      | [66]       |

|                                   |                                          |    |           |    |            |                             |                                                                                 |      |
|-----------------------------------|------------------------------------------|----|-----------|----|------------|-----------------------------|---------------------------------------------------------------------------------|------|
| <i>L. rhamnosus. L. fermentum</i> | 1 x 10 <sup>8</sup>                      | ND | 2 h total | ND | DMEM + FBS | ND                          | Antimicrobial activities against 20 bacterial pathogens                         | [67] |
| <i>L. plantarum</i>               | 10 <sup>5</sup> to 10 <sup>9</sup> /well | ND | 2 to 4 h  | ND | DMEM/F12   | Microscopic; flow cytometry | Antioxidant and cytoprotective activities of cells exposed to hydrogen peroxide | [68] |
| <i>L. johnsonii</i>               | 10 <sup>6</sup> /well<br>MOI 3           | ND | 3 h       | ND | DME/F-12   | ND                          | Alleviation of <i>S. Typhimurium</i> -induced tight junction injury             | [69] |

\* Limited to probiotics that tend to acidify the medium : lactobacilli, *Bifidobacterium*, *Pediococcus* and *Enterococcus*. Excludes, for example, probiotic cultures of *Bacillus*, *Saccharomyces* or *Clostridium*.

⌘ A new taxonomy of lactobacilli has been published [9], but the form used in the references will be used in this table for purposes of accuracy of citations.

#### MEDIUM:

\*\* DMEM/F12 containing 0 % to 10 % FSB

#### INOCULATION :

- Considering 0.5 mL/well (transwell : 0.5 mL recommended on apical side )
- Considering 1 mL/well (24 wells plate : 0.5 mL to 1.2 mL recommended)
- Considering 2 mL/well (12 wells plate)
- Considering 200 µL (96 wells plate : 100 µL to 200 µL recommended)
- Considering 1 mL/well (transwell )
- No IPEC-J2 population was given in these article

**Table S2:** Growth of the various probiotics in the Buffered Maintenance Medium (BMM) at inoculation levels of approximately  $10^7$  and  $10^8$  cells/mL after 22 h in incubation in presence of (cell) or in absence of (no cell) IPEC-J2 cells. Values are in viable counts in a flow cytometry analysis (FC<sub>V</sub>).

| Culture                              | Target: $10^7$ bacteria/mL |                        |                   |          |            | Target: $10^8$ bacteria/mL |                        |                   |          |            |
|--------------------------------------|----------------------------|------------------------|-------------------|----------|------------|----------------------------|------------------------|-------------------|----------|------------|
|                                      | Inoculated<br>(bact. / mL) | Incubated (bact. / mL) |                   | MF*      |            | Inoculated<br>(bact. / mL) | Incubated (bact. / mL) |                   | MF*      |            |
|                                      |                            | No cells **            | With cells        | No cells | With cells |                            | No cells               | With cells        | No cells | With cells |
| <i>Lactobacillus plantarum</i> 299V  | $1.3 \times 10^7$          | $2.0 \times 10^7$      | $1.3 \times 10^8$ | 1.4      | 12         | $1.3 \times 10^8$          | $5.6 \times 10^8$      | $4.9 \times 10^8$ | 4.2      | 4.3        |
| <i>Lactobacillus paracasei</i> A234  | $2.1 \times 10^7$          | $1.2 \times 10^8$      | $8.0 \times 10^8$ | 5.0      | 38         | $2.1 \times 10^8$          | $6.0 \times 10^8$      | $1.2 \times 10^9$ | 2.7      | 6.0        |
| <i>Bifidobacterium lactis</i> A026   | $1.4 \times 10^7$          | $8.4 \times 10^6$      | $7.1 \times 10^7$ | 0.6      | 5          | $1.4 \times 10^8$          | $1.8 \times 10^8$      | $3.4 \times 10^8$ | 1.3      | 2.5        |
| <i>Lactobacillus rhamnosus</i> GG    | $1.4 \times 10^7$          | $1.3 \times 10^8$      | $1.6 \times 10^8$ | 10       | 14         | $1.4 \times 10^8$          | $3.8 \times 10^8$      | $2.3 \times 10^8$ | 3.5      | 2.1        |
| <i>Lactobacillus rhamnosus</i> R0011 | $2.3 \times 10^7$          | $3.8 \times 10^7$      | $2.5 \times 10^8$ | 1.5      | 11         | $2.3 \times 10^8$          | $5.6 \times 10^8$      | $5.7 \times 10^8$ | 2.4      | 2.5        |
| <i>Bifidobacterium longum</i> R0175  | $2.3 \times 10^7$          | $2.6 \times 10^7$      | $2.6 \times 10^8$ | 1.1      | 12         | $2.3 \times 10^8$          | $2.7 \times 10^8$      | $7.8 \times 10^8$ | 1.2      | 3.5        |
| <i>Lactobacillus gasseri</i> A237    | $1.5 \times 10^7$          | $3.7 \times 10^6$      | $1.2 \times 10^7$ | 0.3      | 0.8        | $1.5 \times 10^8$          | $3.6 \times 10^7$      | $1.1 \times 10^8$ | 0.3      | 0.8        |
| <i>Escherichia coli</i> Nissle       | $1.6 \times 10^7$          | $1.7 \times 10^9$      | NA                | 108      | NA         | $1.6 \times 10^8$          | $2.6 \times 10^9$      | NA                | 16       | NA         |
| <i>Escherichia coli</i> DH5          | $2.4 \times 10^7$          | $1.5 \times 10^9$      | NA                | 64       | NA         | $2.4 \times 10^8$          | $1.9 \times 10^9$      | NA                | 7.9      | NA         |

\* MF = Multiplication factor, which represents : (number of bacteria in the incubated medium) / (number of bacteria inoculated)

\*\* No cell = Probiotics only. With cells = Probiotics with IPEC-J2 animal cells.

**Table S3.** Viability of IPEC-J2 in incubated Minimal Medium (MM) having reached a pH of 5.0, as well as in a bacterial-free MM adjusted to pH 5.0 with lactic acid.

| Treatment          |                     | IPEC-J2 Viability (%) |                 |
|--------------------|---------------------|-----------------------|-----------------|
|                    |                     | Neutral red           | FC <sub>A</sub> |
| Probiotics strains |                     |                       |                 |
| R0011              | (10 <sup>7</sup> )* | 75                    | 28              |
| A237               | (10 <sup>9</sup> )  | 52                    | 22              |
| A026               | (10 <sup>8</sup> )  | 36                    | 8               |
| 299v               | (10 <sup>8</sup> )  | 34                    | 5               |
| R0175              | (10 <sup>7</sup> )  | 18                    | 5               |
| GG                 | (10 <sup>8</sup> )  | 27                    | 28              |
| A234               | (10 <sup>8</sup> )  | 21                    | 5               |
| Probiotic-free     |                     |                       |                 |
| Lactic acid        |                     | 40                    | 22              |
| Probiotic-free     |                     |                       |                 |
| Sodium Lactate     |                     | 100                   | -               |

FC<sub>A</sub> : Apoptosis as observed by Flow Cytometry

\* Values in brackets indicate the inoculation level

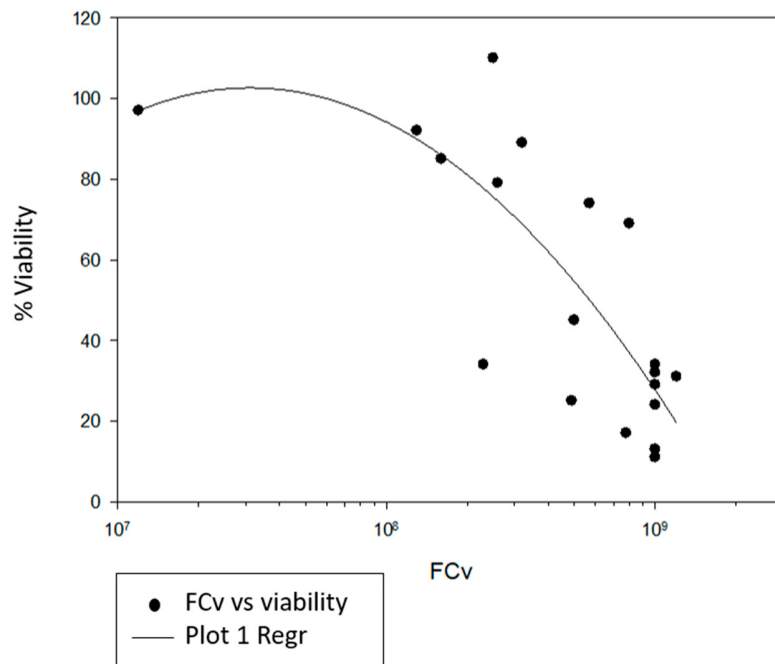

**Figure S1:** The effect of the bacterial population reached in the BMM medium after the 22 h incubation (FCv) and the resulting viability levels of the IPEC-J2 cells (assessed by Neutral Red).
